# Supplementary material for: Predictors of Inpatient Psychiatric Hospitalization for Children and Adolescents with Autism Spectrum Disorder
Source: Springer Nature journal article supplement (doi:10.1007/s10803-017-3154-9), 2017-05-23
Supplement: MOESM1 [file 12307528]

Supplemental Table 1: Summary of cohort populations (frequency-matched on the dimensions of age and gender) and ADOS-2 module distribution.

| **Predisposing Factors** | **AIC Sample** *(N=218)* | **AIC Sample Range** | **RI-CART Sample** *(N=255)* | **RI-CART Sample Range** | **AIC vs. RI-CART (p-value)** |
| --- | --- | --- | --- | --- | --- |
| **Gender** (Male) N(%) | 168 (77%) |  | 204 (80%) |  |  |
| **Age** (years) M(SD) | 12.8 (3.3) | 4-21 | 12.3 (3.9) | 4-21 | 0.132 |
| **ADOS-2 Module** M(SD) |  |  |  |  |  |
| 1 | 83 (37.7%) |  | 53 (20.8%) |  |  |
| 2 | 28 (12.7%) |  | 27 (10.6%) |  |  |
| 3 | 90 (40.9% |  | 130 (51%) |  |  |
| 4 | 19 (8.6%) |  | 45 (17.6%) |  |  |

* Comparisons are statistically significant at a Bonferroni-corrected *p* < 0.003
